# Supplementary material for: High Sensitivity Surface Plasmon Resonance Sensor Based on Two-Dimensional MXene and Transition Metal Dichalcogenide: A Theoretical Study
Source: MDPI journal article supplement (doi:10.3390/nano9020165), 2019-01-29
Supplement: s1 [file s1]

# Supporting Information

## Two-dimensional transition metal dichalcogenides mediated long range surface plasmon resonance biosensors

Yi Xu,<sup>1,2</sup> Yee Sin Ang,<sup>1</sup> Lin Wu,<sup>2</sup> and L. K. Ang<sup>1,\*</sup>

<sup>1</sup>*SUTD-MIT International Design Center & Science and Math Cluster,*

*Singapore University of Technology and Design (SUTD), 8 Somapah Road, Singapore 487372*

<sup>2</sup>*Institute of High Performance Computing, Agency for Science, Technology, and Research (A\*STAR),*

*1 Fusionopolis Way, #16-16 Connexis, Singapore 138632*

---

\* ricky\_ang@sutd.edu.sg

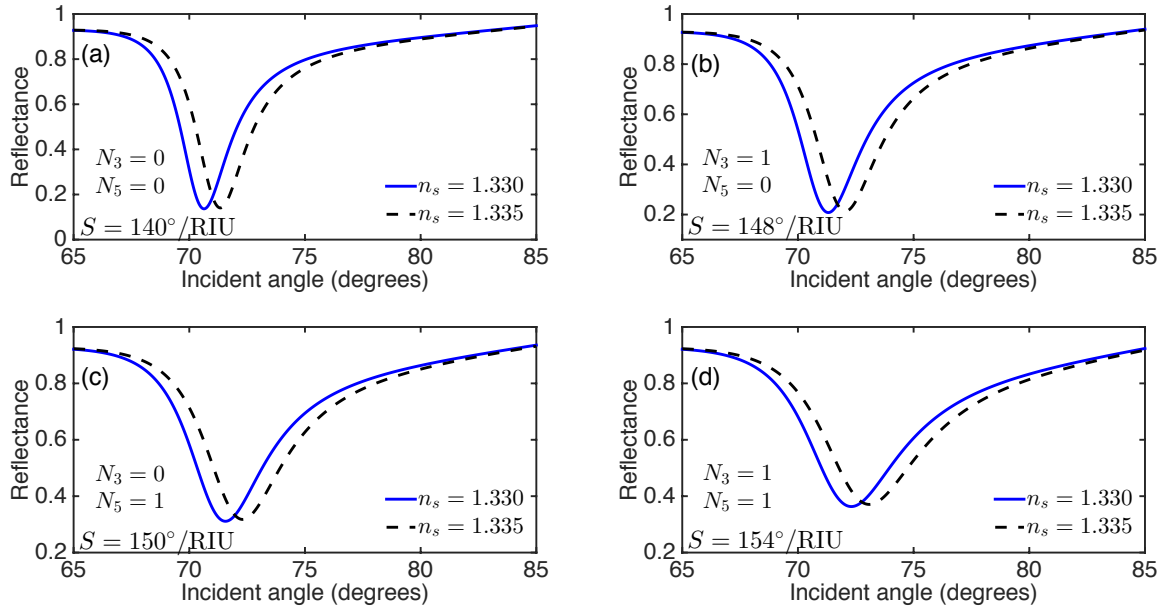

**Figure S1.** Reflectance as a function of the incident angle before (solid lines) and after (dashed lines) the variation of analyte RI for the  $\text{Ti}_3\text{C}_2\text{T}_x\text{-MoSe}_2$ -based SPR sensor with (a)  $N_3 = 0$ ,  $N_5 = 0$ , (b)  $N_3 = 1$ ,  $N_5 = 0$ , (c)  $N_3 = 0$ ,  $N_5 = 1$ , and (d)  $N_3 = 1$ ,  $N_5 = 1$ .

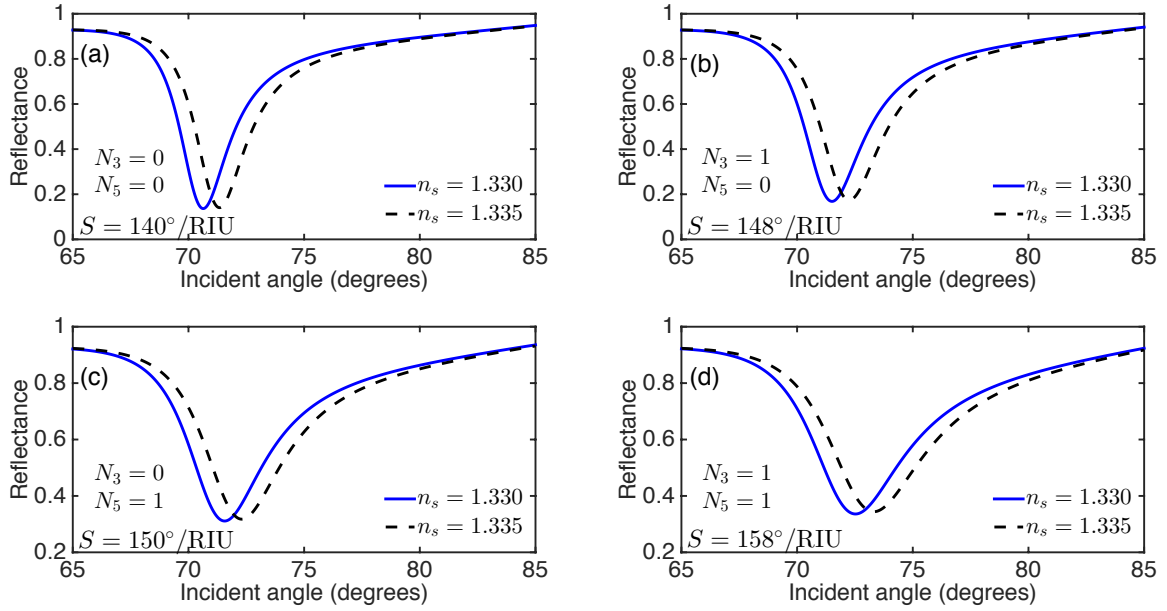

**Figure S2.** Reflectance as a function of the incident angle before (solid lines) and after (dashed lines) the variation of analyte RI for the  $\text{Ti}_3\text{C}_2\text{T}_x\text{-WS}_2$ -based SPR sensor with (a)  $N_3 = 0$ ,  $N_5 = 0$ , (b)  $N_3 = 1$ ,  $N_5 = 0$ , (c)  $N_3 = 0$ ,  $N_5 = 1$ , and (d)  $N_3 = 1$ ,  $N_5 = 1$ .

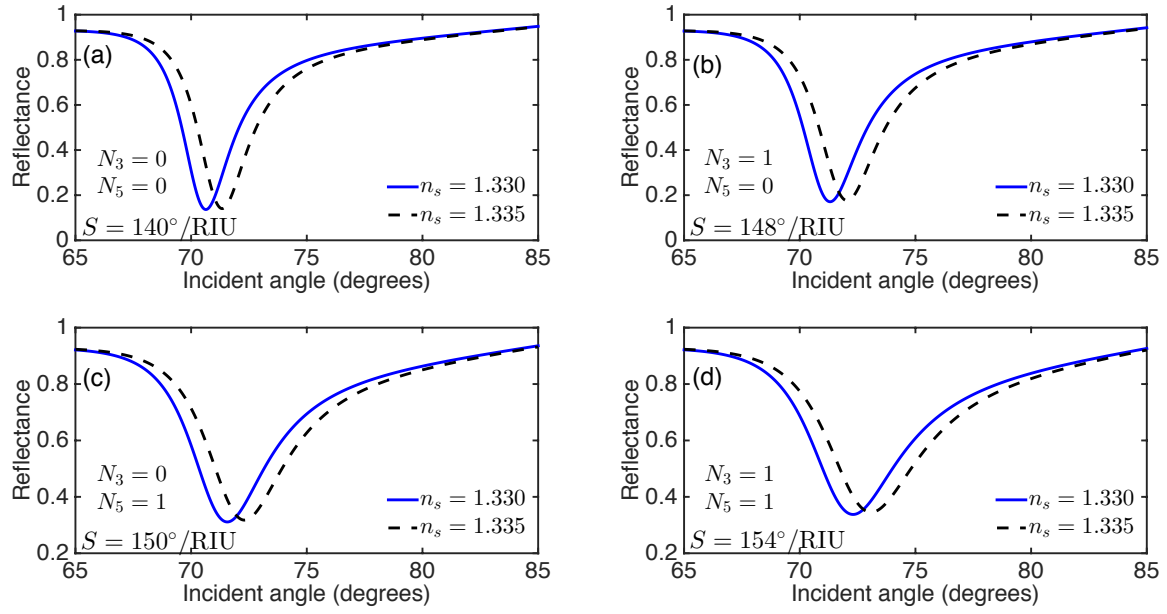

**Figure S3.** Reflectance as a function of the incident angle before (solid lines) and after (dashed lines) the variation of analyte RI for the  $\text{Ti}_3\text{C}_2\text{T}_x$ -WSe<sub>2</sub>-based SPR sensor with (a)  $N_3 = 0, N_5 = 0$ , (b)  $N_3 = 1, N_5 = 0$ , (c)  $N_3 = 0, N_5 = 1$ , and (d)  $N_3 = 1, N_5 = 1$ .

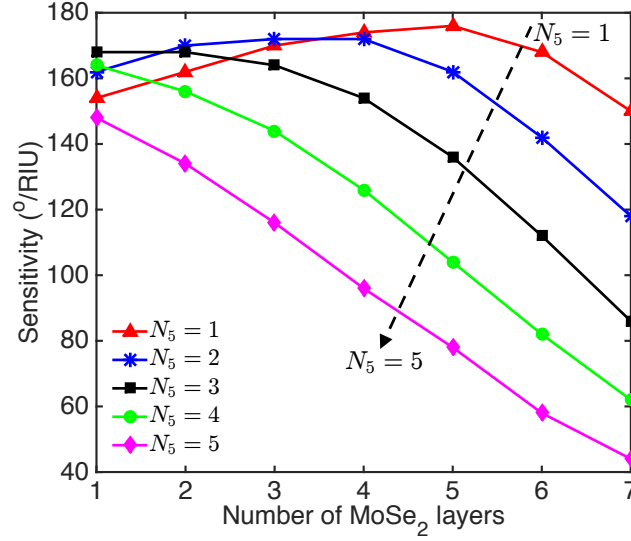

**Figure S4.** Sensitivity as a function of the number of MoSe<sub>2</sub> layers for  $\text{Ti}_3\text{C}_2\text{T}_x$ -MoSe<sub>2</sub>-based SPR sensor with different layers of  $\text{Ti}_3\text{C}_2\text{T}_x$ .

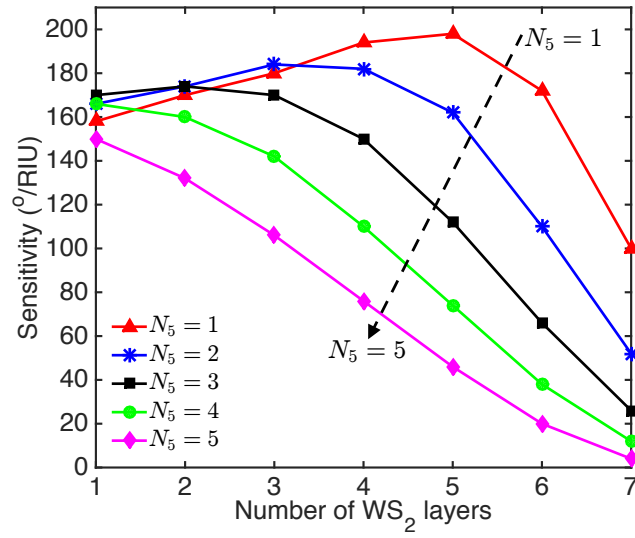

**Figure S5.** Sensitivity as a function of the number of  $WS_2$  layers for  $Ti_3C_2T_x$ - $WS_2$ -based SPR sensor with different layers of  $Ti_3C_2T_x$ .

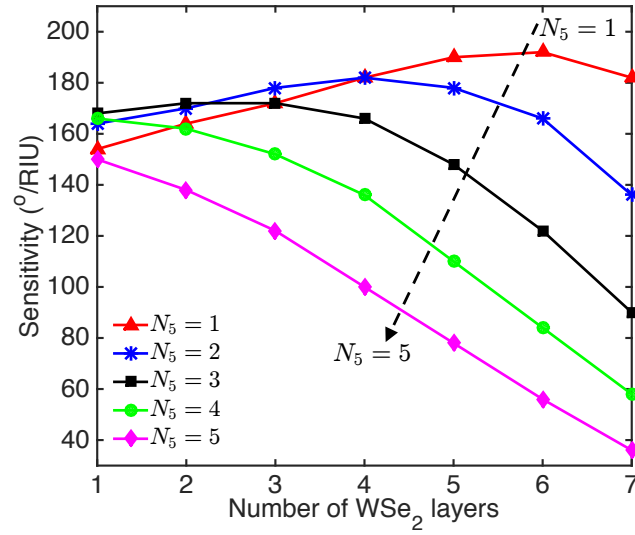

**Figure S6.** Sensitivity as a function of the number of  $WSe_2$  layers for  $Ti_3C_2T_x$ - $WSe_2$ -based SPR sensor with different layers of  $Ti_3C_2T_x$ .
